# Supplementary material
Source: publisher site journal article supplement (https://www.dovepress.com/article/459983)
Supplement: Supplementary file 1 [file get_supplementary_file.php]

# Supplementary Materials

## Supplementary Table 1. Treatment characteristics of patients in the US subset previously treated with sorafenib

| **Variable** | **US (n=57)** |
| --- | --- |
| **Baseline cancer characteristics** |  |
| **Child–Pugh classification, n (%)** |  |
| A | 17 (29.8) |
| B | 3 (5.3) |
| C | 1 (1.8) |
| Missing | 36 (63.2) |
| **ECOG PS, n (%)** |  |
| 0/1 | 34 (59.6) |
| ≥2 | 1 (1.8) |
| Missing | 22 (38.6) |
| **BCLC stage, n (%)** |  |
| A (Early stage) | 2 (3.5) |
| B (Intermediate stage) | 5 (8.8) |
| C (Advanced stage) | 18 (31.6) |
| D (End-stage) | 1 (1.8) |
| Missing | 31 (54.4) |
| **Time (in months) between initial diagnosis of uHCC to start of sorafenib, median (IQR)** | 4.60 (1.5, 22.0) |
| **Duration of prior sorafenib treatment (months), median (Q1, Q3)** | 4.1 (2.7, 7.6) |
| **Initial daily dose, mg** |  |
| Median (Q1, Q3) | 800 (400, 800) |
| 200 mg, n (%) | 4 (7.0) |
| 400 mg, n (%) | 24 (42.1) |
| 800 mg, n (%) | 29 (50.9) |
| **Highest daily dose, mg** |  |
| Median (Q1, Q3) | 800 (800, 800) |
| 400 mg | 2 (3.5) |
| 600 mg | 2 (3.5) |
| 800 mg | 21 (36.8) |
| Missing | 32 (56.1) |
| **Changes to the initial dose during treatment with sorafenib, n (%)** |  |
| Yes | 25 (43.9) |
| No | 32 (56.1) |
| **Reason for discontinuation, n (%)** |  |
| Adverse event/toxicity | 10 (17.5) |
| Progression, recurrence/relapse of HCC | 36 (63.2) |
| Switch to other treatment | 9 (15.8) |
| Others | 2 (3.5) |

**Abbreviations:** BCLC, Barcelona Clinic Liver Cancer; ECOG PS, Eastern Cooperative Oncology Group Performance Status; HCC, hepatocellular carcinoma; IQR, interquartile range; Q, quartile; uHCC, unresectable HCC; US, United States.

## Supplementary Table 2. Adverse events related to sorafenib in patients in the US subset previously treated with sorafenib

| **Adverse events by MedDRA SOC/PT, n (%)** | **Total, n=57** |
| --- | --- |
| Patients with sorafenib-related side effects | 30 (52.6) |
| **General disorders and administration-site conditions** | 17 (29.8) |
| Fatigue | 17 (29.8) |
| **Skin and subcutaneous tissue disorders** | 16 (28.1) |
| Drug eruption | 2 (3.5) |
| Hand-foot skin reaction | 14 (24.6) |
| **Gastrointestinal disorders** | 14 (24.6) |
| Diarrhea | 14 (24.6) |
| **Metabolism and nutrition disorders** | 7 (12.3) |
| Decreased appetite | 7 (12.3) |
| **Vascular disorders** | 4 (7.0) |
| Secondary hypertension | 4 (7.0) |

**Abbreviations:** MedDRA, Medical Dictionary for Regulatory Activities; PT, Preferred Term; SOC, System Organ Class; US, United States.

## Supplementary Table 3. Characteristics of patients in the US subset who had received prior systemic anti-cancer therapies other than sorafenib

| **Drugs for prior systemic anti-cancer therapy, n (%)** | **Total n=24** |
| --- | --- |
| Nivolumab | 13 (54.2) |
| Lenvatinib, lenvatinib mesilate | 7 (29.2) |
| Cabozantinib | 2 (8.3) |
| Napabucasin | 2 (8.3) |
| Tremelimumab | 2 (8.3) |
| **Reason for discontinuation, n (%)** |  |
| Progression, recurrence/relapse of HCC | 15 (62.5) |
| Switch to other treatment | 8 (33.3) |
| Adverse events | 1 (4.2) |
| Patient decision | 1 (4.2) |
| Other | 1 (4.2) |
| **Other prior multikinase inhibitor, n (%)** |  |
| Yes | 8 (33.3) |
| No | 16 (66.7) |
| **Drugs for other prior multikinase treatment, n (%)** |  |
| Lenvatinib, lenvatinib mesilate | 7 (29.2) |
| Cabozantinib | 2 (8.3) |
| Tivozanib | 1 (4.2) |
| **Prior immune checkpoint inhibitor, n (%)** |  |
| Yes | 16 (66.7) |
| No | 8 (33.3) |
| **Drugs for prior immune checkpoint inhibitor treatment, n (%)** |  |
| Nivolumab | 13 (54.2) |
| Tremelimumab | 2 (8.3) |
| Pembrolizumab | 1 (4.2) |
| **Other prior immunotherapy, n (%)** |  |
| Yes | 2 (8.3) |
| No | 22 (91.7) |
| **Drugs for prior immunotherapy, n (%)** |  |
| Mogamulizumab | 1 (4.2) |
| Pexastimogene devacirepvec | 1 (4.2) |
| **Prior systemic anti-cancer therapy not considered as treatment line, n (%)** |  |
| No | 24 (100.0) |

**Abbreviations:** HCC, hepatocellular carcinoma; US, United States.

## Supplementary Table 4. Adverse events related to systemic anti-cancer therapy in patients treated with prior systemic anti-cancer therapies other than sorafenib

| **Adverse events by MedDRA SOC/PT** | **Total**  **n=24** |
| --- | --- |
| Patients with treatment-related side effects | 10 (41.7) |
| **General disorders and administration-site conditions, n (%)** | 6 (25.0) |
| Asthenia | 1 (4.2) |
| Fatigue | 6 (25.0) |
| Peripheral swelling | 2 (8.3) |
| **Gastrointestinal disorders, n (%)** | 6 (25.0) |
| Abdominal pain | 1 (4.2) |
| Colitis | 1 (4.2) |
| Diarrhea | 2 (8.3) |
| Gastrointestinal hemorrhage | 1 (4.2) |
| Nausea | 1 (4.2) |
| **Skin and subcutaneous tissue disorders,  n (%)** | 3 (12.5) |
| HFSR | 1 (4.2) |
| Rash | 3 (12.5) |

**Abbreviations:** HFSR, hand-foot skin reaction; MedDRA, Medical Dictionary for Regulatory Activities; PT, Preferred Term; SOC, System Organ Class; US, United States.

## Supplementary Table 5. Treatment responses in patients with prior systemic anti-cancer therapies other than sorafenib

| **Prior systemic anti-cancer therapy (other than sorafenib), n (%)** | **Total**  **n=24** |
| --- | --- |
| Partial response | 1 (4.2) |
| Stable disease | 2 (8.3) |
| Progressive disease by clinical judgment | 6 (25.0) |
| Progressive disease by response assessment criteria | 14 (58.3) |
| Unknown | 1 (4.2) |
| **Tumor progression during or after treatment with prior systemic anti-cancer therapy, n (%)** |  |
| Yes | 20 (83.3) |
| **Radiologically confirmed progression, n (%)** |  |
| Yes | 20 (83.3) |
| **Type of progression, n (%)** |  |
| New lesion | 5 (20.8) |
| New vascular invasion | 2 (8.3) |
| Progression of target lesion | 17 (70.8) |

**Abbreviations:** Q, quartile; SD, standard deviation.

## Supplementary Table 6. TEAEs experienced by patients in the US and non-US subsets by MedDRA SOC and PT

| **Adverse events by MedDRA SOC/PT, n (%)** | **US  (n=65)** | **Non-US (n=940)** |
| --- | --- | --- |
|  |  |  |
| **Patients with any TEAEs** | 59 (90.8) | 862 (91.7) |
| **Gastrointestinal disorders** | 30 (46.2) | 506 (53.8) |
| Diarrhea | 11 (16.9) | 285 (30.3) |
| Nausea | 9 (13.8) | 71 (7.6) |
| Constipation | 7 (10.8) | 64 (6.8) |
| Abdominal pain | 5 (7.7) | 109 (11.6) |
| Ascites | 4 (6.2) | 60 (6.4) |
| **Nervous system disorders** | 20 (30.8) | 121 (12.9) |
| Dizziness | 5 (7.7) | 25 (2.7) |
| Headache | 4 (6.2) | 17 (1.8) |
| Hepatic encephalopathy | 5 (7.7) | 26 (2.8) |
| **General disorders and administration-site conditions** | 26 (40.0) | 437 (46.5) |
| Fatigue | 17 (26.2) | 183 (19.5) |
| Death | 4 (6.2) | 12 (1.3) |
| Edema peripheral | 4 (6.2) | 59 (6.3) |
| Pyrexia | 2 (3.1) | 69 (7.3) |
| Asthenia | 1 (1.5) | 107 (11.4) |
| **Metabolism and nutrition disorders** | 17 (26.2) | 233 (24.8) |
| Decreased appetite | 11 (16.9) | 166 (17.7) |
| **Skin and subcutaneous tissue disorders** | 17 (26.2) | 406 (43.2) |
| HFSR | 8 (12.3) | 321 (34.1) |
| **Investigations** | 16 (24.6) | 170 (18.1) |
| Aspartate aminotransferase increased | 5 (7.7) | 41 (4.4) |
| Alanine aminotransferase increased | 4 (6.2) | 38 (4.0) |
| **Respiratory, thoracic, and mediastinal disorders** | 11 (16.9) | 175 (18.6) |
| Dysphonia | 4 (6.2) | 61 (6.5) |
| Dyspnea | 4 (6.2) | 46 (4.9) |
| **Hepatobiliary disorders** | 9 (13.8) | 109 (11.6) |
| **Infections and infestations** | 8 (12.3) | 125 (13.3) |
| **Injury, poisoning, and procedural complications** | 8 (12.3) | 52 (5.5) |
| Off-label use | 4 (6.2) | 27 (2.9) |
| **Vascular disorders** | 8 (12.3) | 126 (13.4) |
| Hypertension | 6 (9.2) | 109 (11.6) |
| **Musculoskeletal and connective tissue disorders** | 7 (10.8) | 136 (14.5) |
| **Psychiatric disorders** | 7 (10.8) | 45 (4.8) |
| **Blood and lymphatic system disorders** | 5 (7.7) | 89 (9.5) |
| Anemia | 3 (4.6) | 57 (6.1) |
| **Patients with any drug-related TEAEs** | 45 (69.2) | 701 (74.6) |
| **Gastrointestinal disorders** | 19 (29.2) | 352 (37.4) |
| Diarrhea | 9 (13.8) | 249 (26.5) |
| Nausea | 7 (10.8) | 44 (4.7%) |
| **Skin and subcutaneous tissue disorders** | 15 (23.1) | 364 (38.7) |
| HFSR | 8 (12.3) | 301 (32.0) |
| **General disorders and administration-site conditions** | 14 (21.5) | 282 (30.0) |
| Fatigue | 12 (18.5) | 139 (14.8) |
| **Nervous system disorders** | 12 (18.5) | 47 (5.0) |
| **Investigations** | 10 (15.4) | 94 (10.0) |
| **Metabolism and nutrition disorders** | 9 (13.8) | 146 (15.5) |
| Decreased appetite | 8 (12.3) | 125 (13.3) |
| **Respiratory, thoracic, and mediastinal disorders** | 6 (9.2) | 77 (8.2) |
| Dysphonia | 4 (6.2) | 48 (5.1) |
| **Vascular disorders** | 6 (9.2) | 96 (10.2) |
| Hypertension | 6 (9.2) | 90 (9.6) |
| **Injury, poisoning, and procedural complications** | 4 (6.2) | 30 (3.2) |
| Off-label use | 4 (6.2) | 27 (2.9) |

**Abbreviations:** HFSR, hand-foot skin reaction; MedDRA, Medical Dictionary for Regulatory Activities; PT, Preferred Term; SOC, System Organ Class; TEAE, treatment-emergent adverse event; US, United States.

## Supplementary Table 7. Reasons for discontinuation of regorafenib among patients in the US subset and among those who had previously received sorafenib treatment

| **Primary reason for discontinuation of regorafenib, n (%)** | **Total (n=65)** |
| --- | --- |
| Adverse event | 27 (41.5) |
| Lack of efficacy | 2 (3.1) |
| Non-compliance with study drug | 1 (1.5) |
| Patient decision | 2 (3.1) |
| Physician decision | 2 (3.1) |
| Progressive disease | 25 (38.5) |
| Other: not COVID-19 | 4 (6.2) |
| **Patients in the US who had previously received sorafenib treatment, n (%)** | **Total (n=57)** |
| Adverse event | 23 (40.4) |
| Lack of efficacy | 2 (3.5) |
| Patient decision | 2 (3.5) |
| Physician decision | 2 (3.5) |
| Progressive disease | 23 (40.4) |
| Other: not COVID-19 | 4 (7.0) |

**Abbreviation:** US, United States.
